# Supplementary material for: HNRNPA2B1 promotes multiple myeloma progression by increasing AKT3 expression via m6A-dependent stabilization of ILF3 mRNA
Source: Springer Nature journal article supplement (doi:10.1186/s13045-021-01066-6), 2021-04-01

**Figure S1**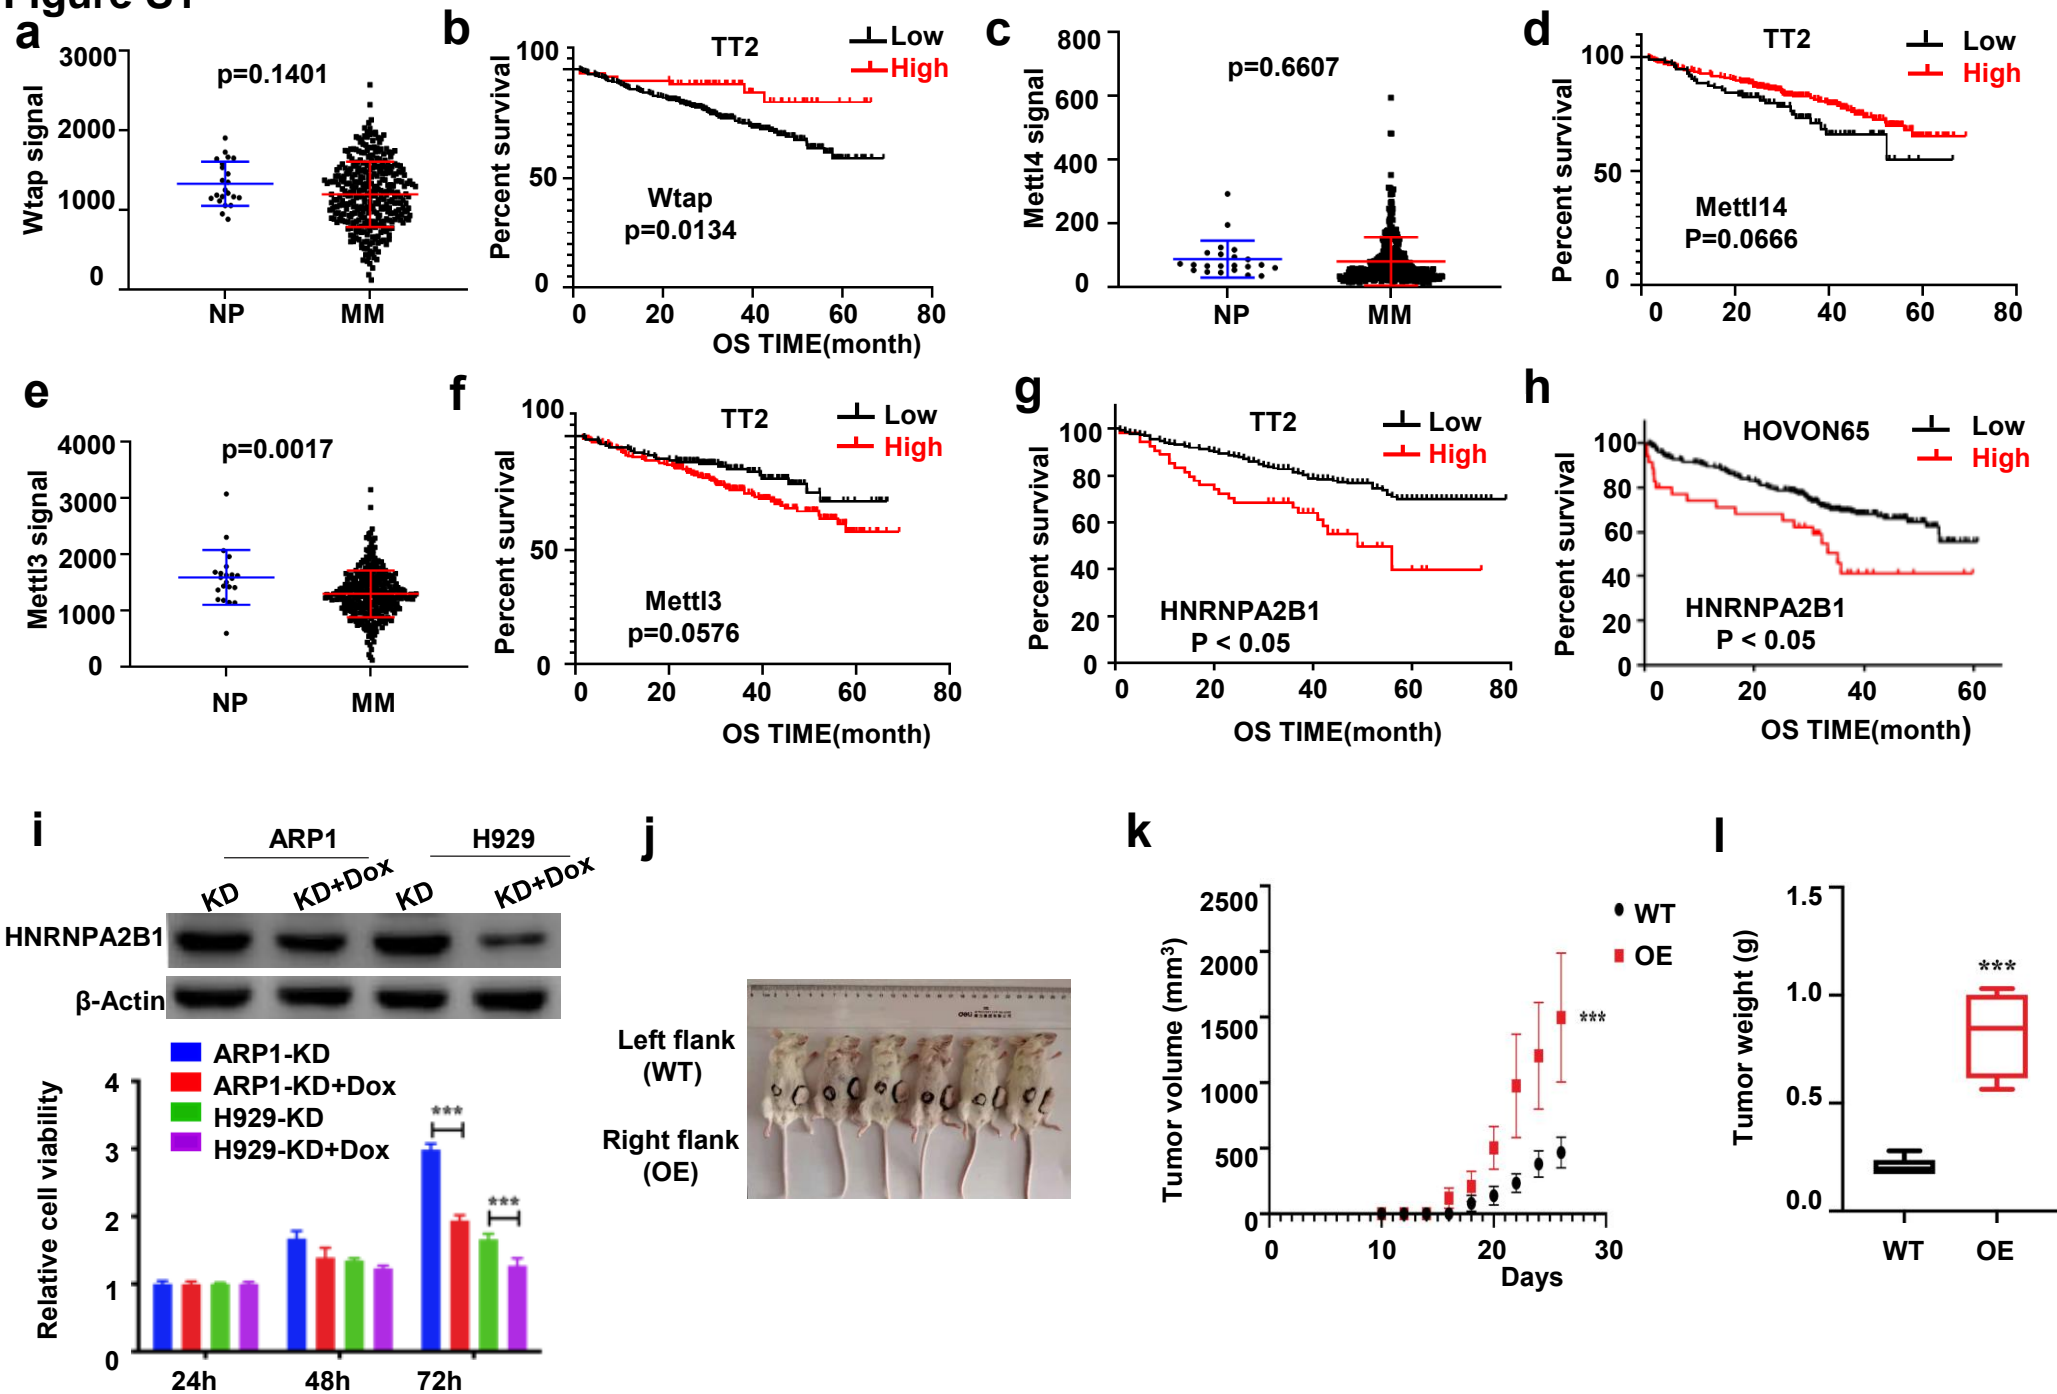

**Figure S2**

**a**

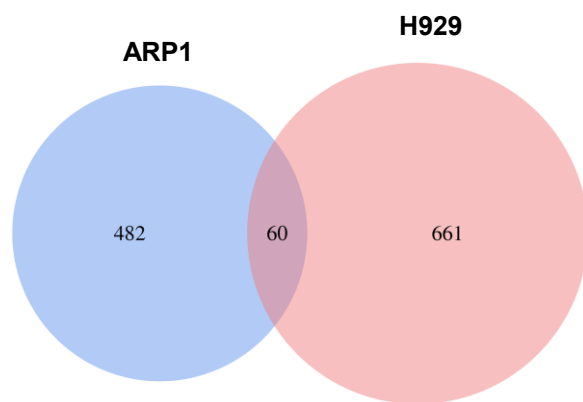

**b**

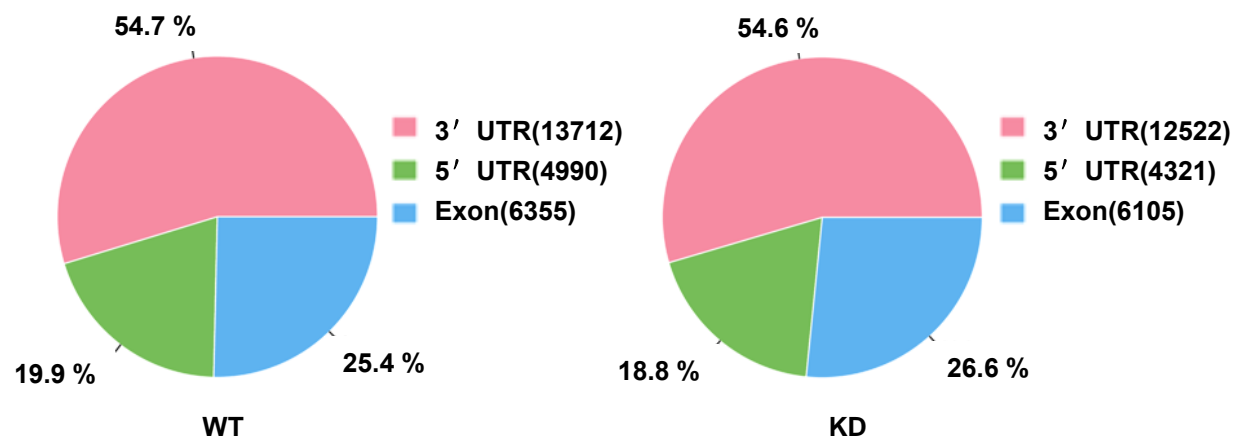

**c**

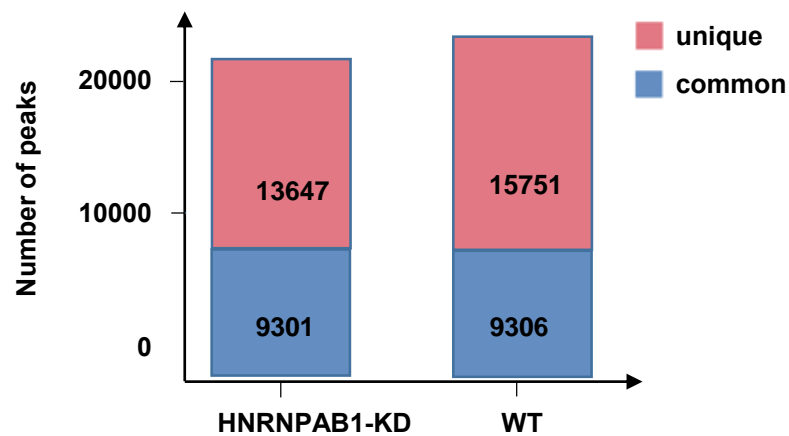

**d**

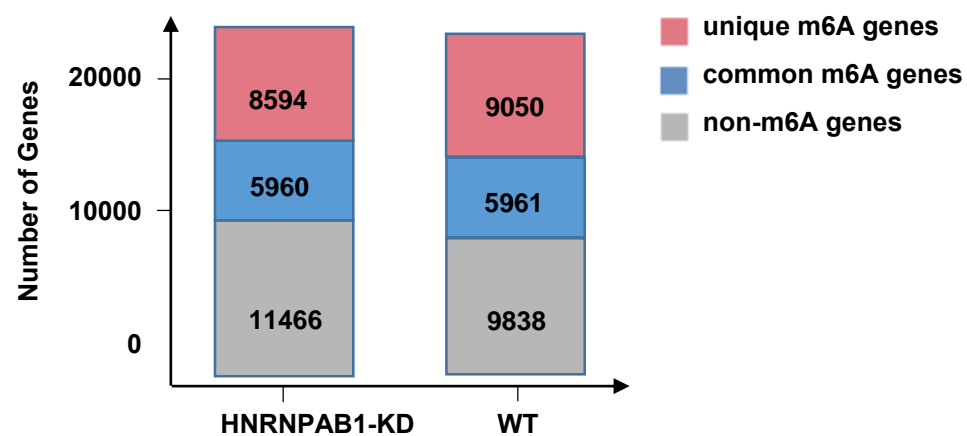

**Figure S3**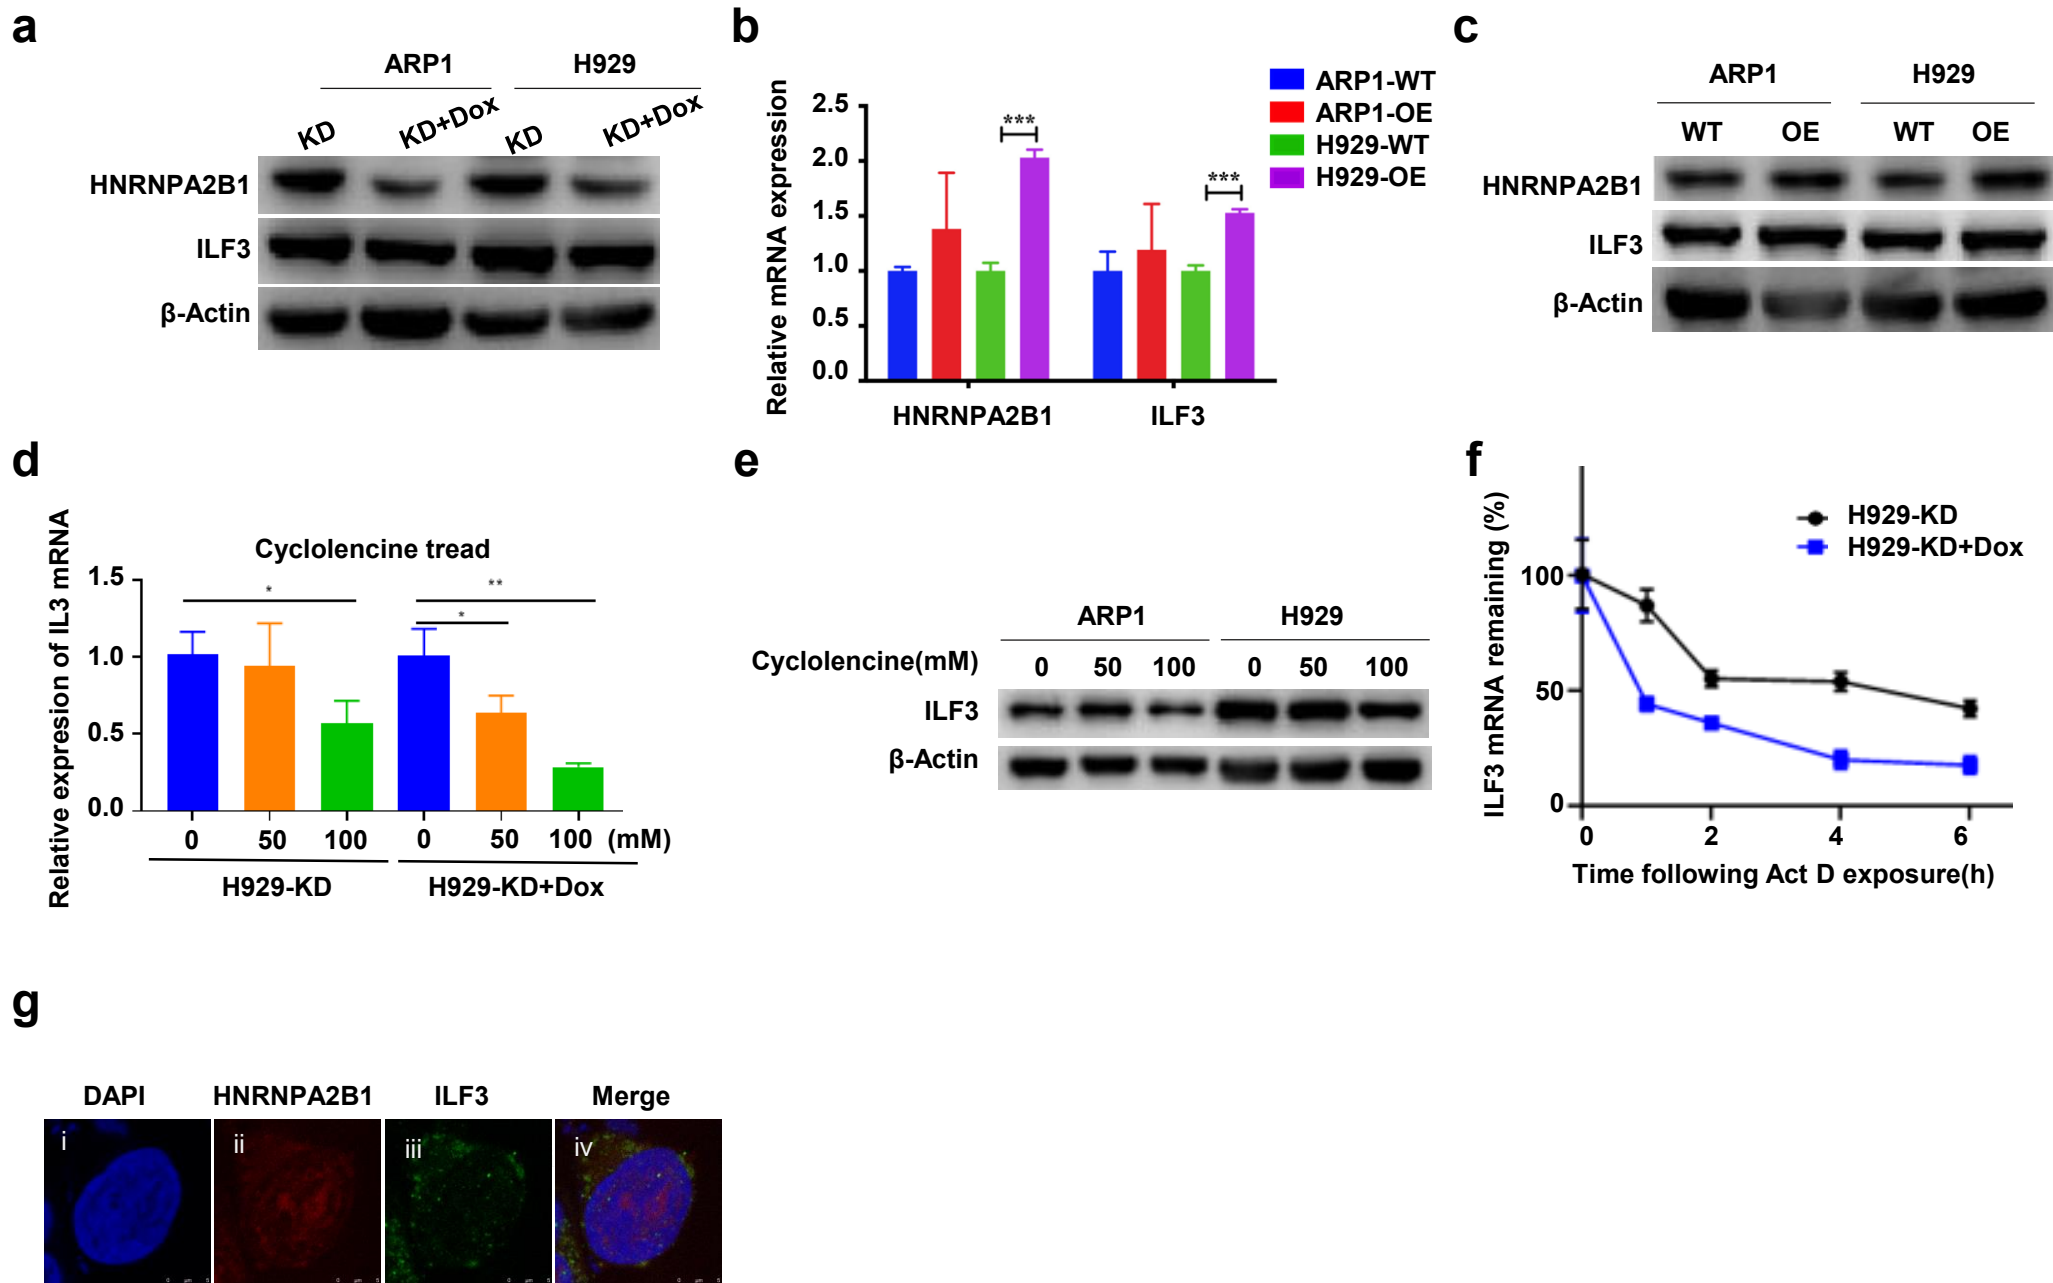

**Figure S4**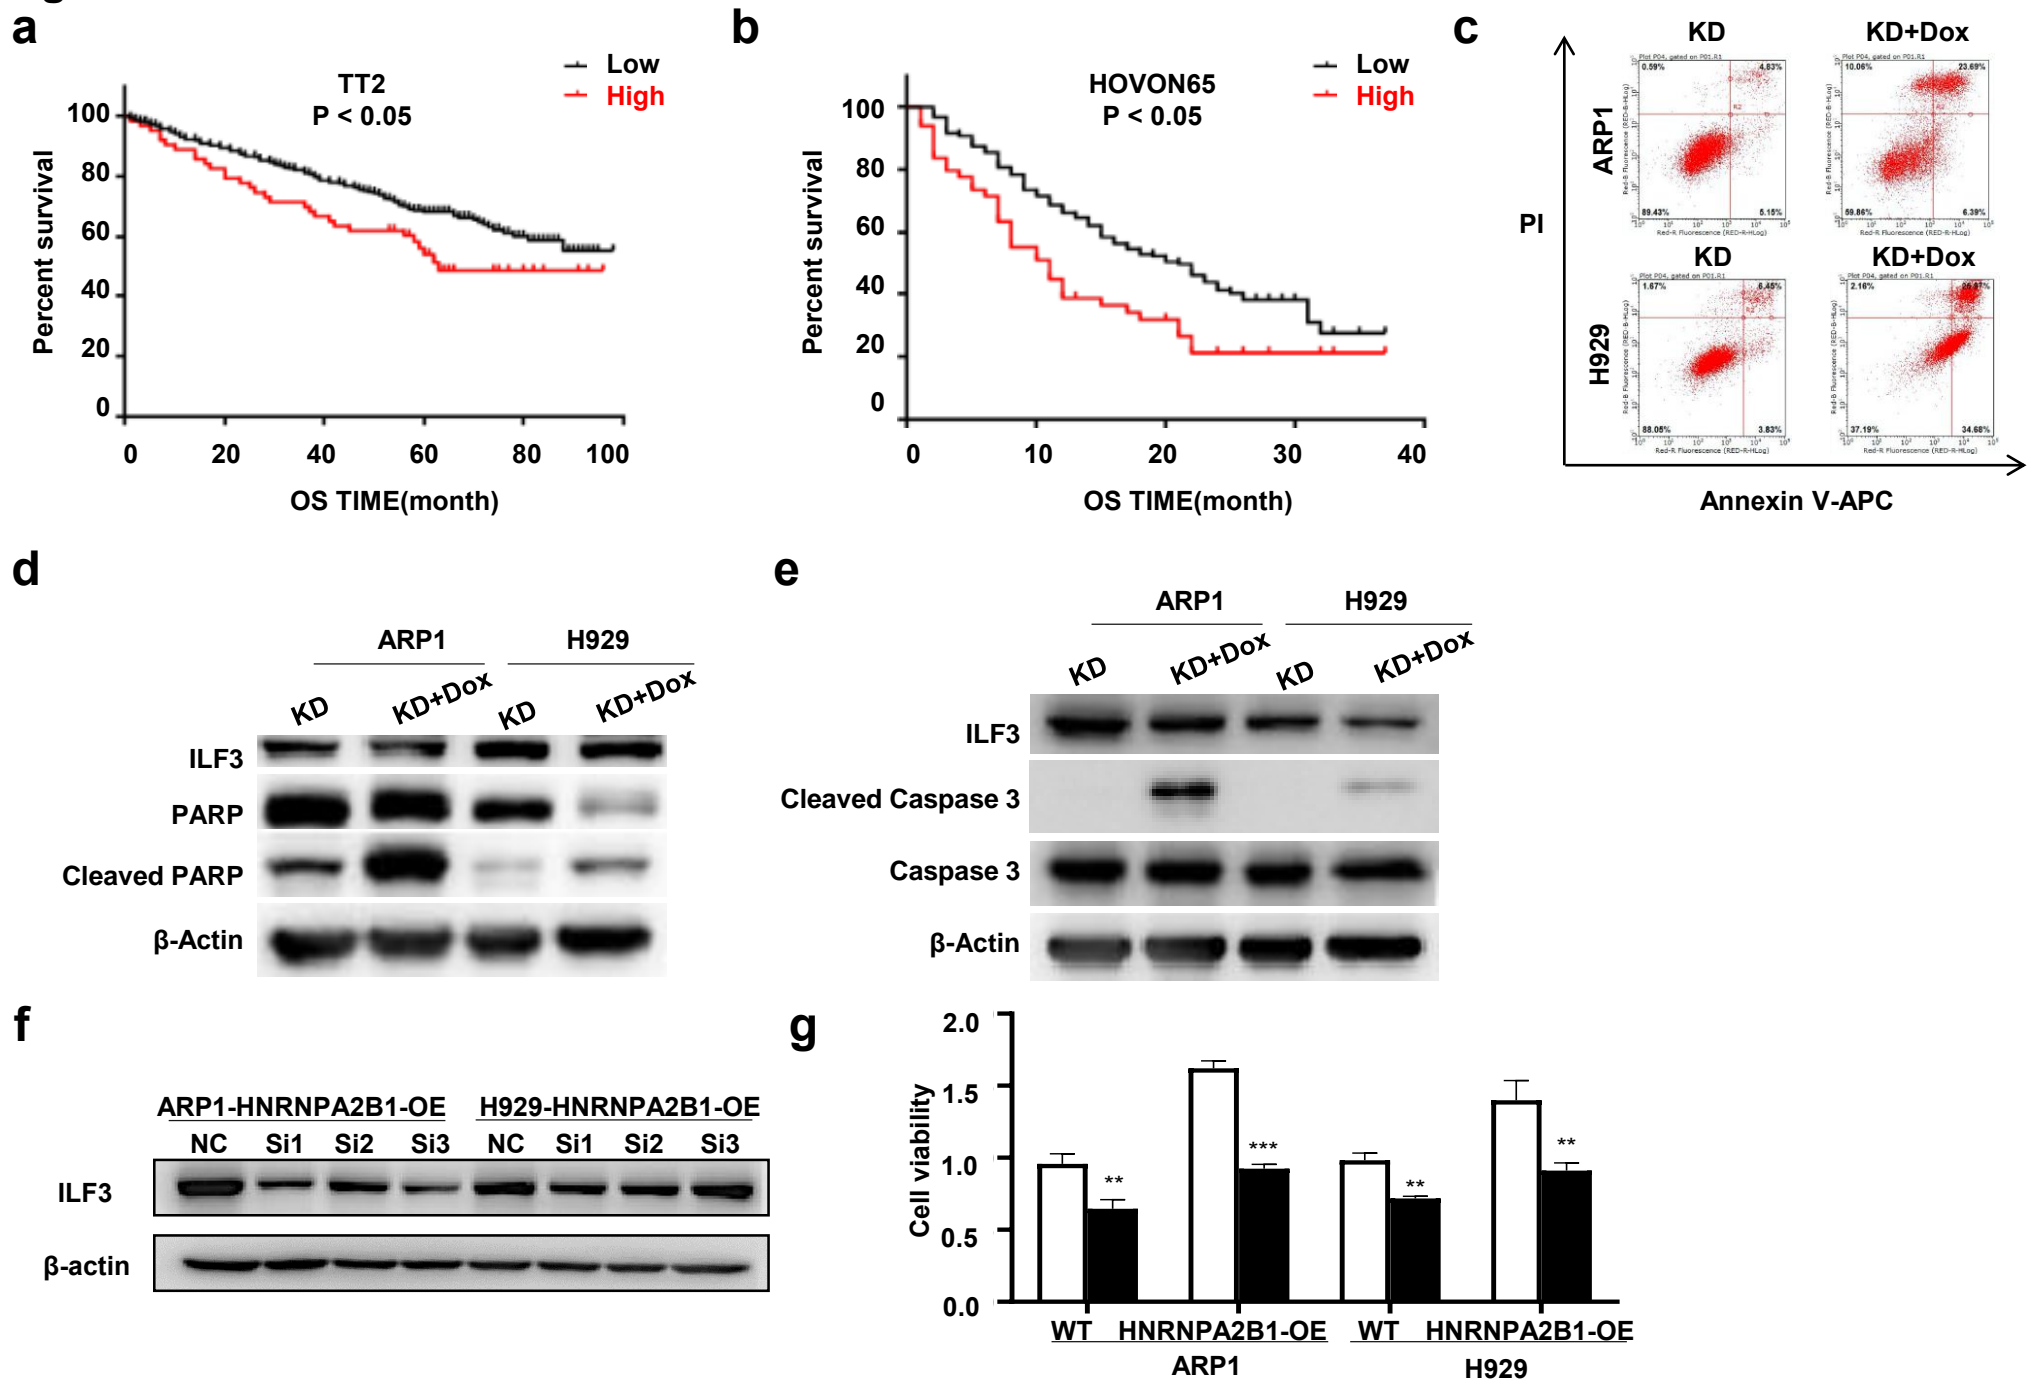

**Figure S5****a**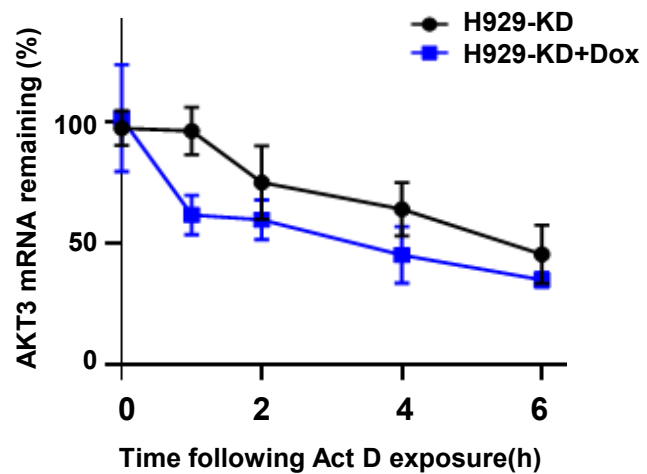**b**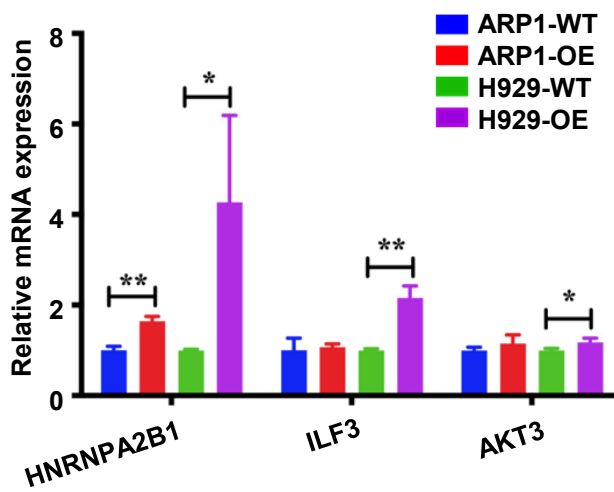**c**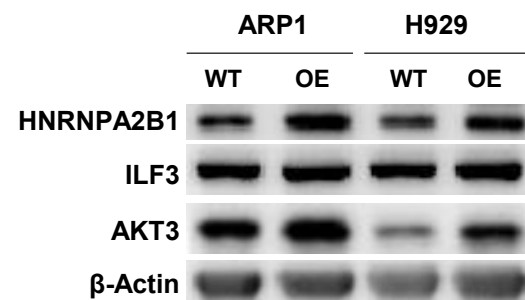

Supplement: MOESM1 [file 19029656]
